# Supplementary material for: A predominant enhancer co-amplified with the SOX2 oncogene is necessary and sufficient for its expression in squamous cancer
Source: PubMed Central journal article supplement (PMC8654995; doi:10.1038/s41467-021-27055-4), 2021-12-08
Supplement: 41467_2021_27055_MOESM1_ESM.pdf [file 41467_2021_27055_MOESM1_ESM.pdf]

**A predominant enhancer co-amplified with the *SOX2* oncogene is necessary and sufficient for its expression in squamous cancer**

Liu et al.

**Supplementary Information**

The Supplementary Information contains 10 Supplementary Figures (including figure legends) and 2 Supplementary Tables.

# Supplementary Figure 1

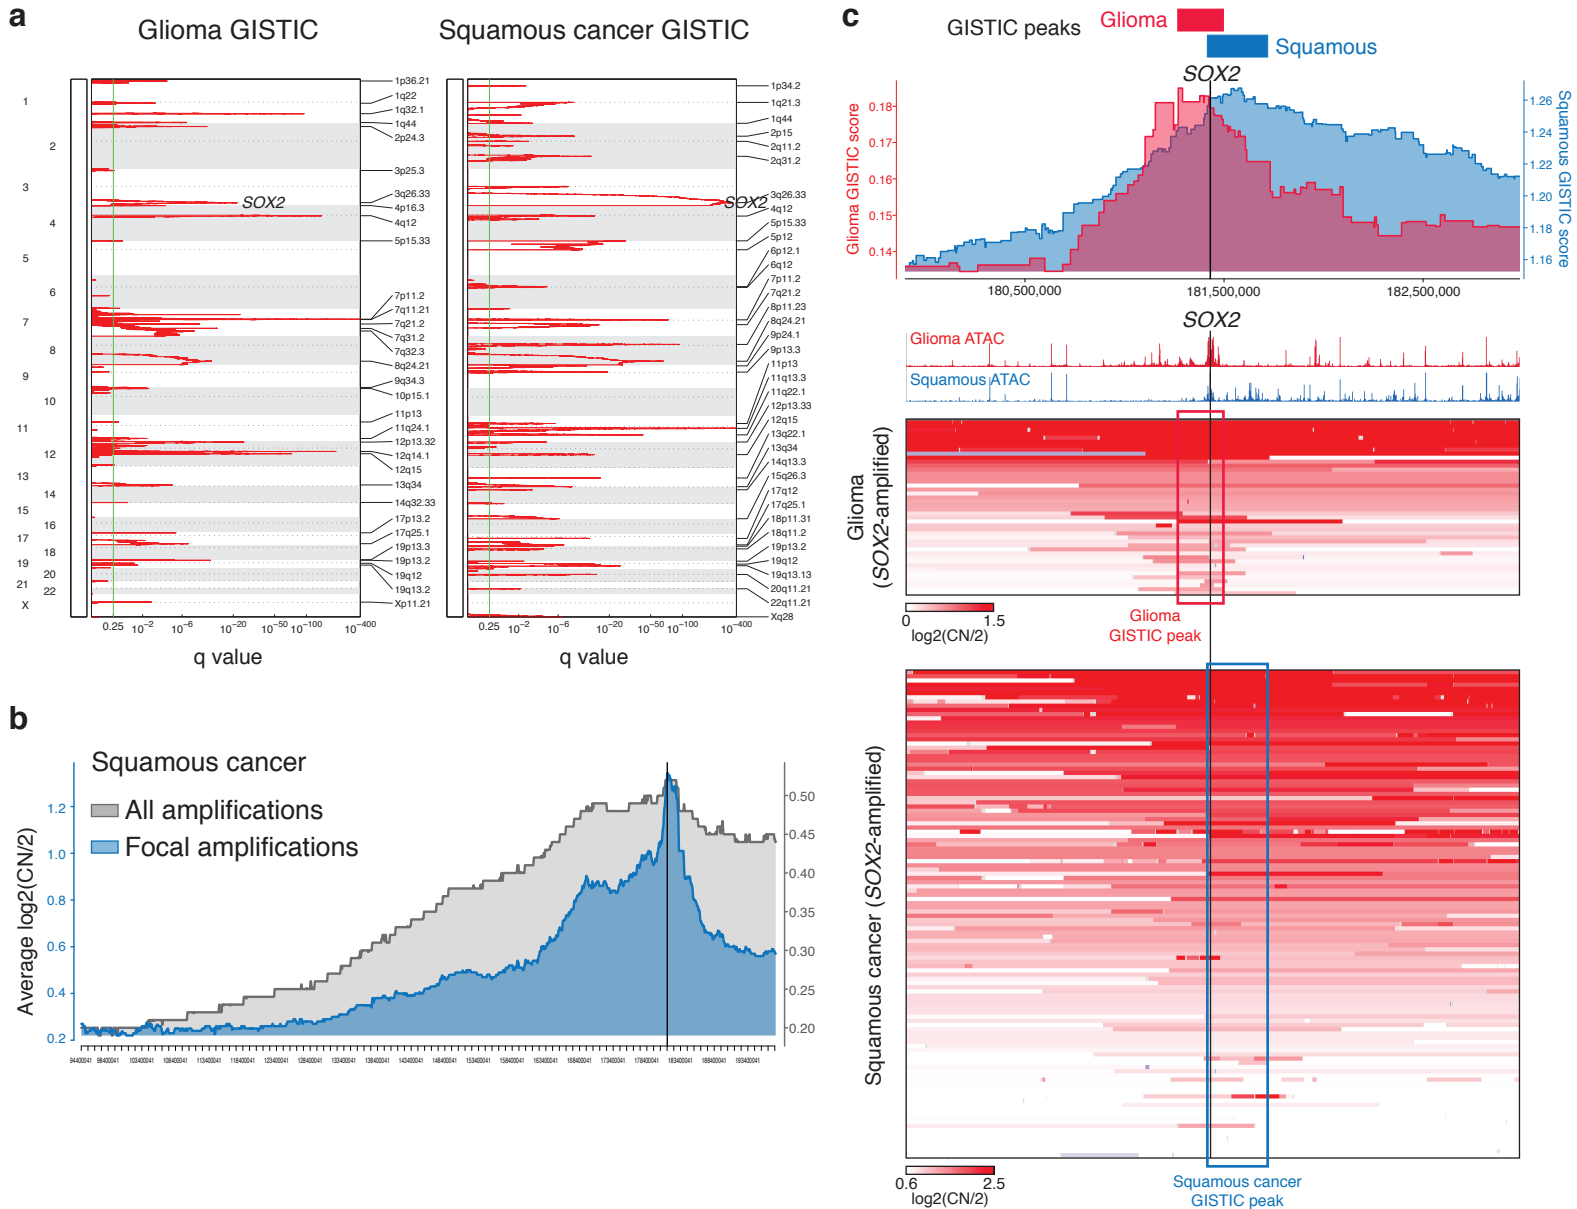

## Supplementary Figure 1:

**a.** GISTIC results from TCGA glioma and squamous cancer samples

**b.** Profiles of the averaged copy number score ( $\log_2(\text{copy number}/2)$ ) for copy number alterations from all squamous cancer samples or focal amplifications (<10 Mb) from samples that are associated with *SOX2* amplifications ( $\log_2(\text{copy number}/2) > 0.1$ ).

**c.** Upper: distribution of GISTIC score in a ~5Mb window centered at the *SOX2* gene. Middle: averaged ATAC-seq signal for TCGA glioma and squamous cancer samples. Bottom: copy number profiles of focal amplifications (<10 Mb) from samples that are associated with *SOX2* amplifications ( $\log_2(\text{copy number}/2) > 0.1$ ).

## Supplementary Figure 2

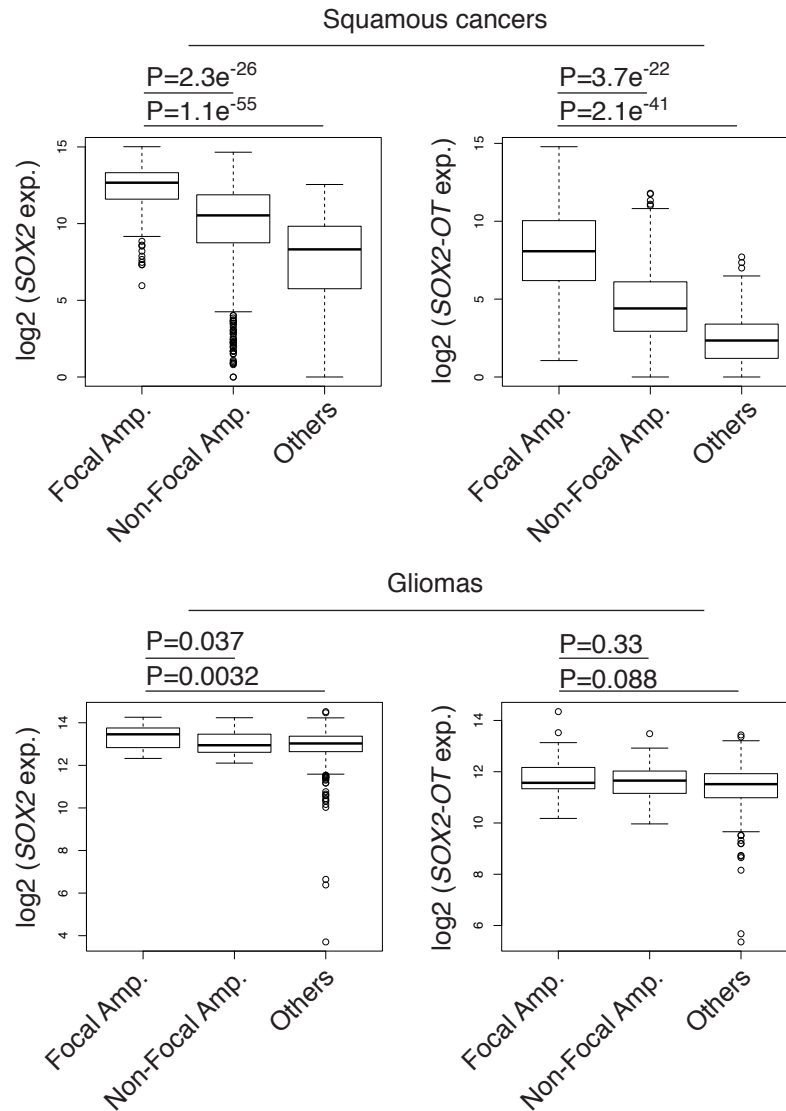

### Supplementary Figure 2:

Expression levels of *SOX2* and *SOX2-OT* in TCGA samples with both RNA-seq and copy number data available. Upper: squamous cancers with *SOX2* focal amplifications (n=122 biologically independent samples), with *SOX2* non-focal amplifications (n=998 biologically independent samples), or without *SOX2* amplifications (n=258 biologically independent samples). Bottom: gliomas with *SOX2* focal amplifications (n=21), with *SOX2* non-focal amplifications (n=71), or without *SOX2* amplifications (n=563). Boxplots: middle bar, median; lower and upper box limits, the first and third quartiles, respectively; whiskers, the first quartile minus 1.5 times the interquartile range (IQR) and the third quartile plus 1.5 times the IQR, respectively. P values are derived from two-sided t-tests.

## Supplementary Figure 3

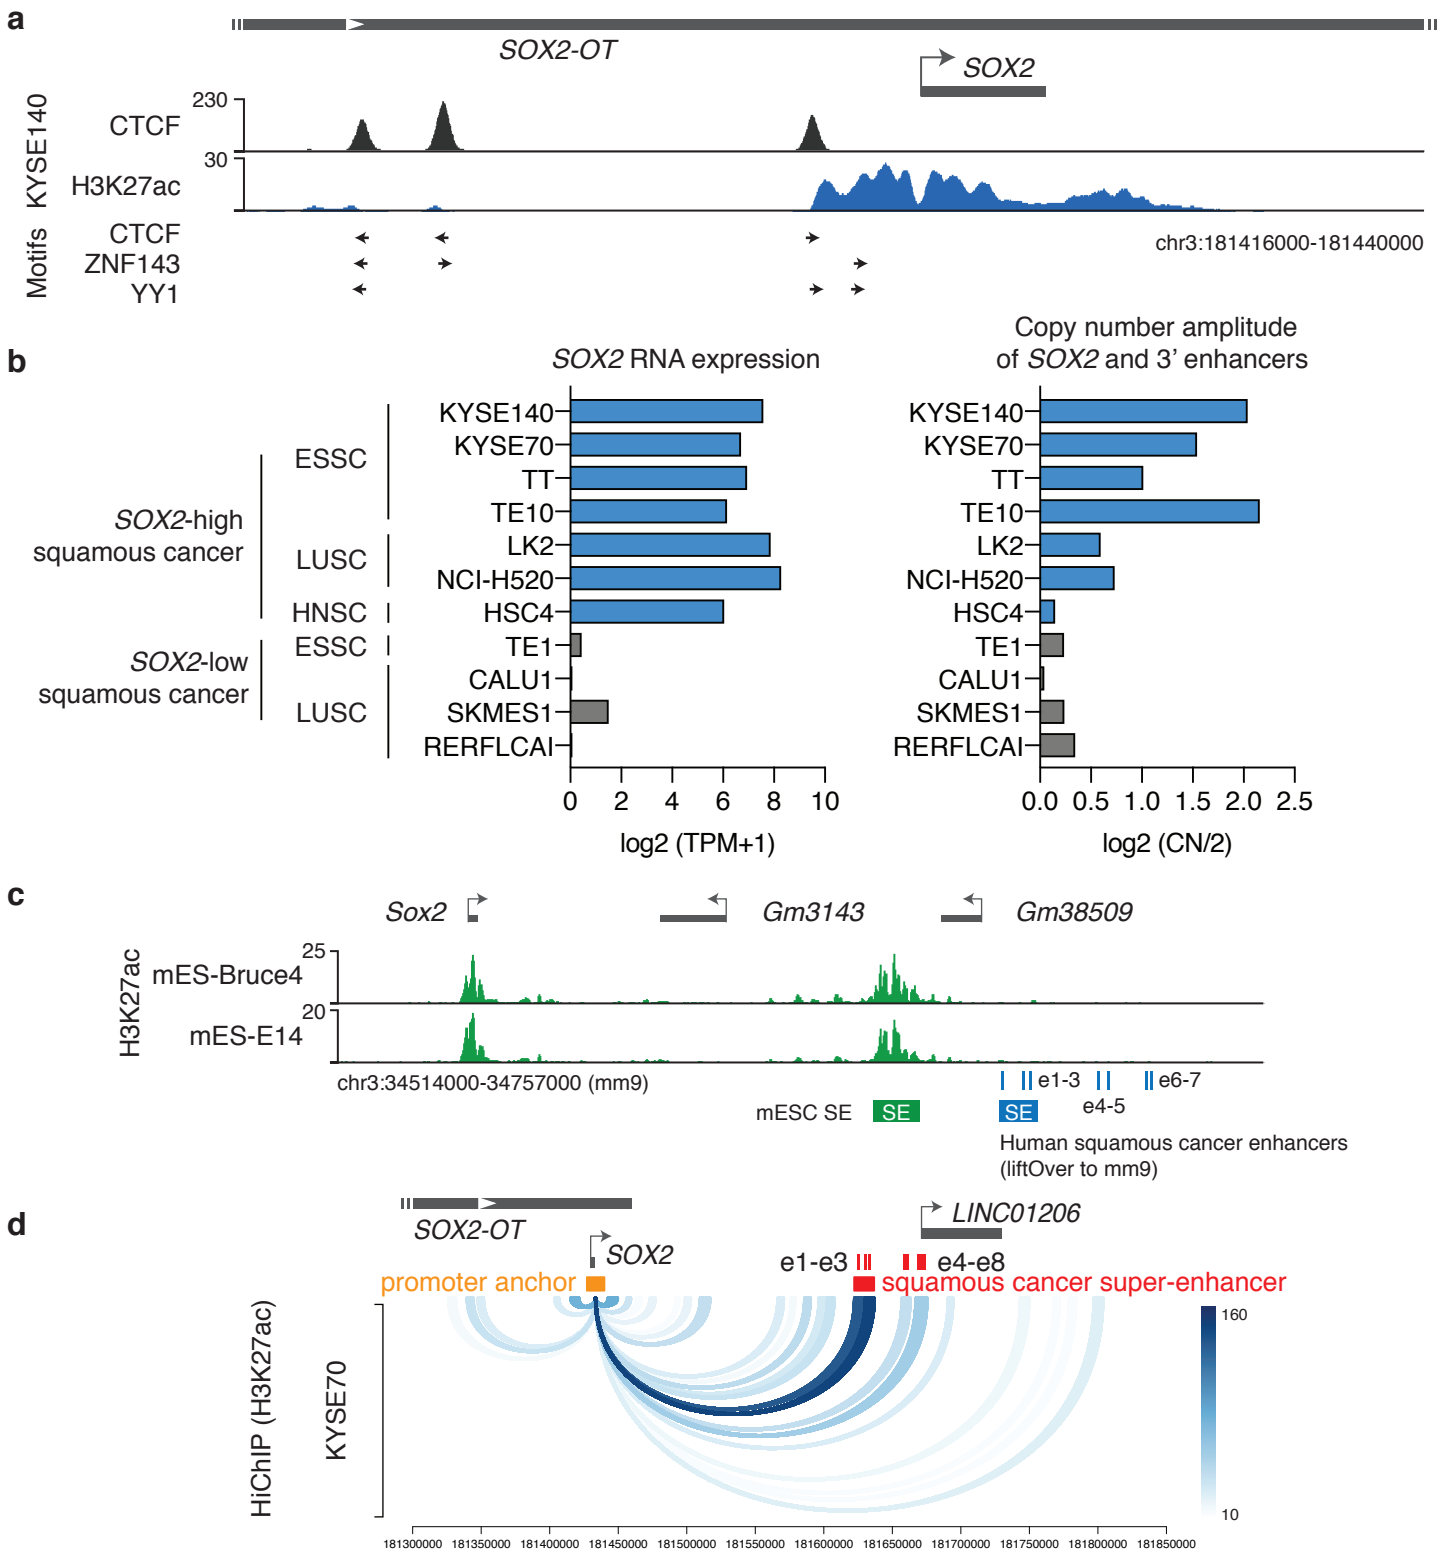

### Supplementary Figure 3:

- a.** The CTCF ChIP-seq profile surrounding the *SOX2* promoter region. Underneath presented are motifs and their orientations of chromatin looping factors CTCF, ZNF143, and YY1.
- b.** Expression level (CCLE RNA-seq:  $\log_2(\text{TPM}+1)$ ) and copy number score (CCLE  $\log_2(\text{copy number}/2)$ ) of the *SOX2* region in squamous cancer cell lines.
- c.** The squamous cancer-specific enhancers and super-enhancer of *SOX2* (converted to mm9 genome) is distinct from the *Sox2* super-enhancer reported for mouse ESC cells. Note: the enhancer e8 listed in Figure 2B has no corresponding region in the mouse mm9 genome (based on the liftOver tool).
- d.** H3K27ac HiChIP loops that are connected to the *SOX2* promoter in the squamous cancer cell line KYSE70. HiChIP anchors are defined by the union of H3K27ac peaks identified from the *SOX2*-high squamous cancer cell lines listed in Figure 2B. The color intensity corresponds to the number of PETs supporting each of the loops. Source data are provided as a Source Data file.

## Supplementary Figure 4

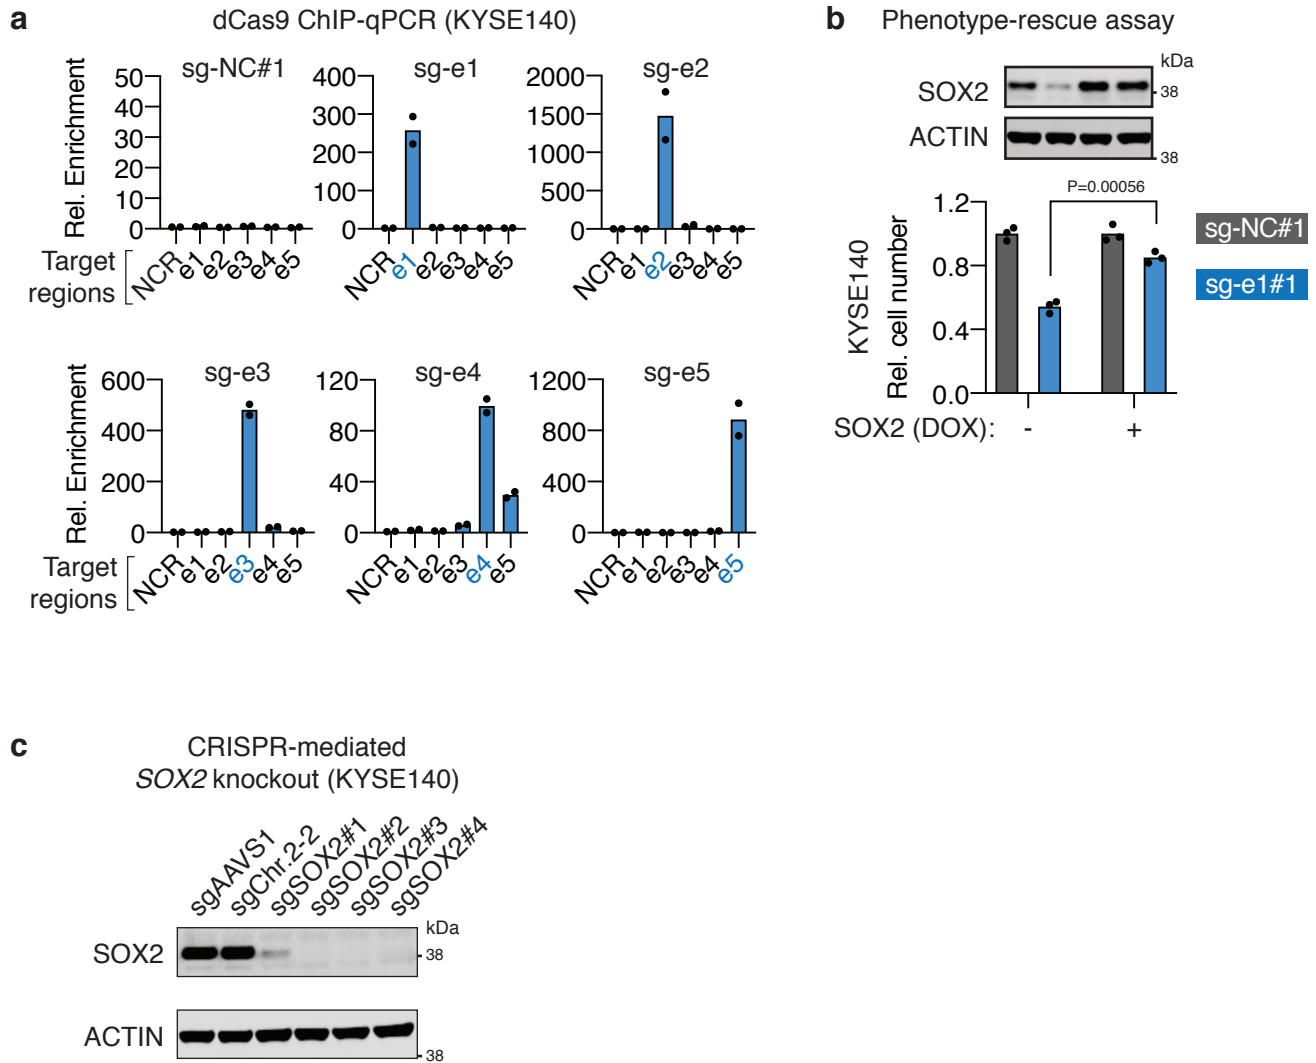

### Supplementary Figure 4:

**a.** Cas9 ChIP-qPCR results showing enrichment of the dCas9-MeCP2-KRAB complex at each of the enhancers that are targeted by sgRNAs. For each region, ChIP-qPCR signal is normalized to sonicated genomic DNA. NCR: negative control region. n=2 biologically independent experiments.

**b.** Doxycycline-induced SOX2 expression in KYSE140 cells rescues the proliferation-inhibitory phenotype caused by e1 repression (six days post seeding the same number of cells with and without e1 repression). n=3 biologically independent experiments. P values are derived from a two-tailed t-test. The immunoblotting experiment was repeated once independently with similar results.

**c.** Immunoblots of SOX2 and ACTIN in KYSE140 cells with and without SOX2 knockouts (three days post selection). KYSE140 cells with all the conditions, except sgSOX2#1, were processed with RNA-seq to identify SOX2-regulated genes. The immunoblotting experiment was repeated once independently with similar results.

Source data are provided as a Source Data file.

## Supplementary Figure 5

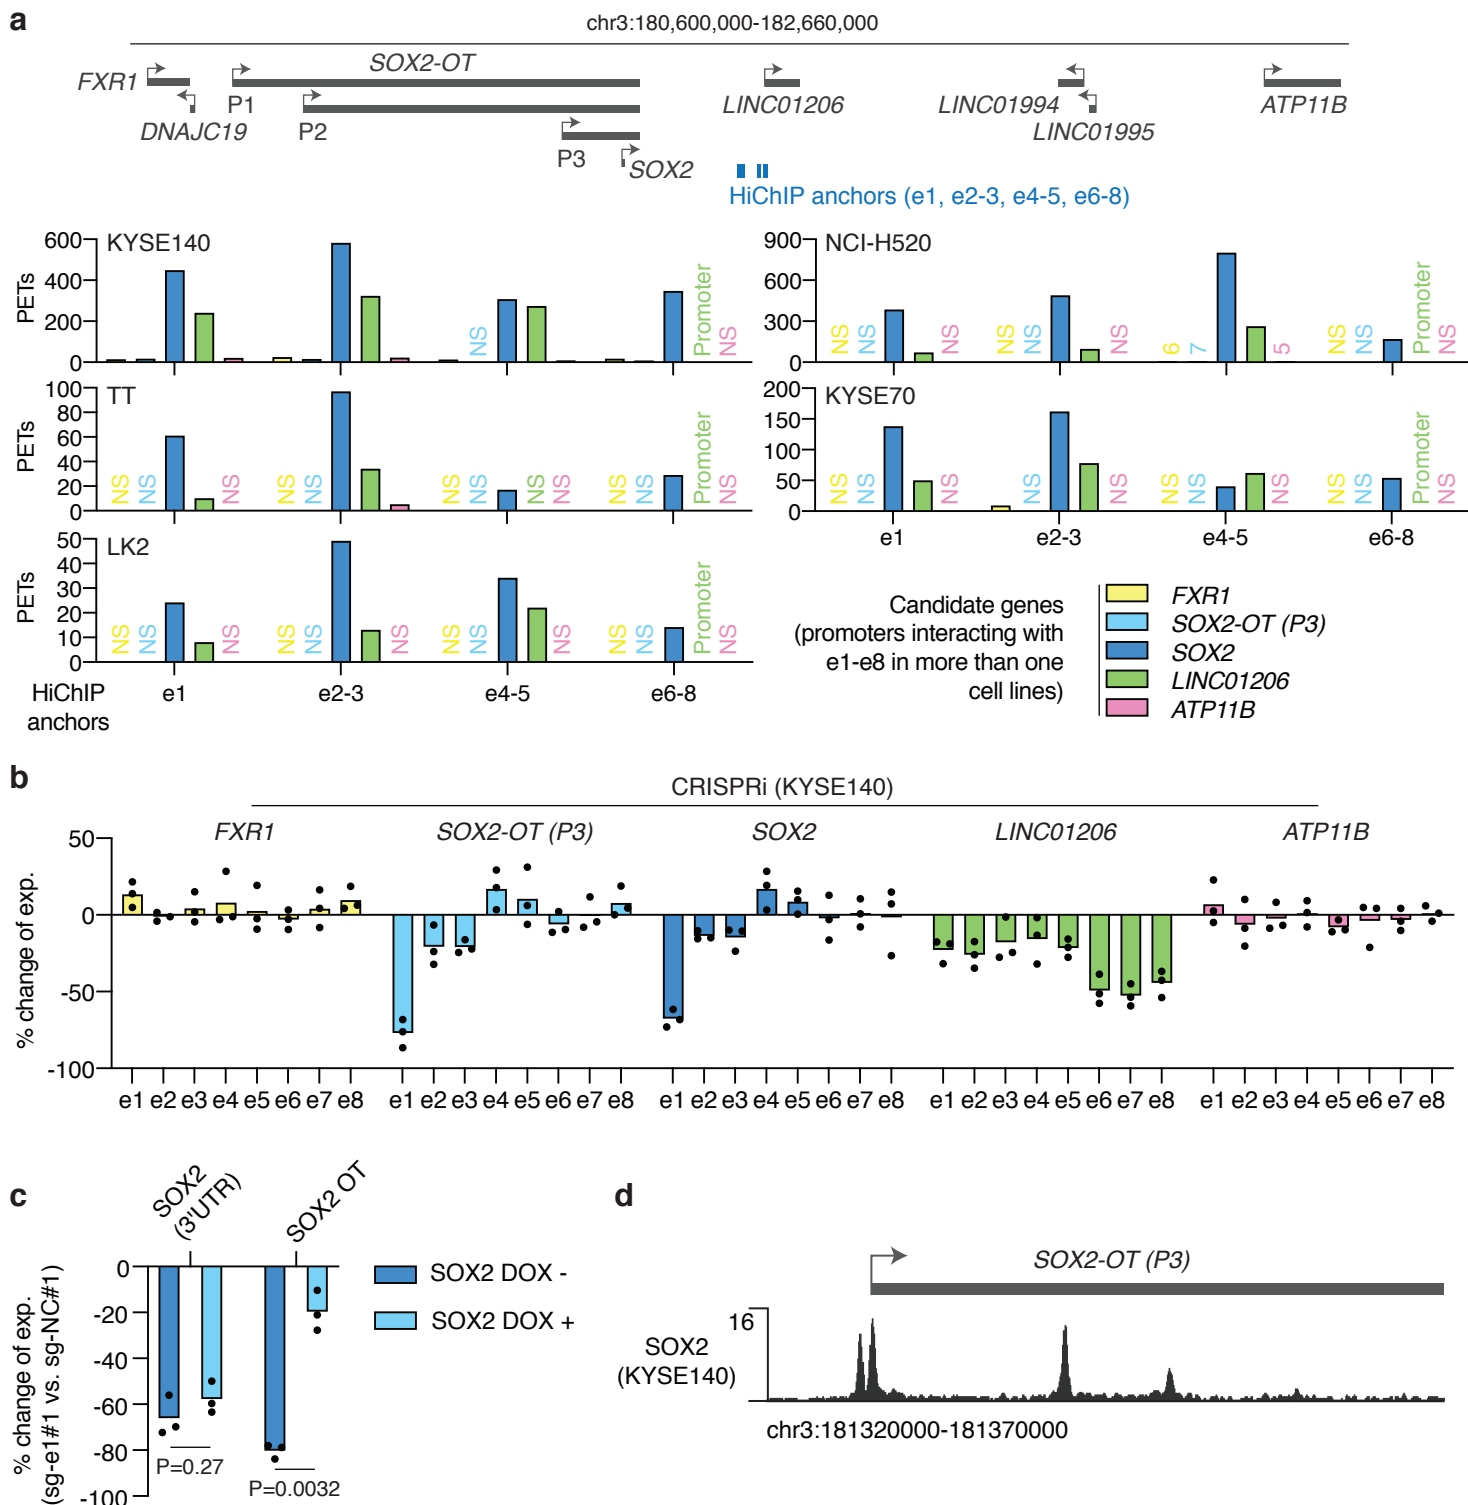

### Supplementary Figure 5:

**a.** Number of PETs that connecting promoter regions of the candidate genes and the four HiChIP enhancer anchors. Note: The *SOX2-OT* gene has three alternative promoters - only the P3 promoter is connected to the enhancer anchors in two of the cell lines. N.S.: no significant loops.

**b.** Expression change (%) of each of the candidate genes in KYSE140 cells after individual repression of e1-e8. Expression level is normalized to the negative control (sg-NC#1). n=3 biologically independent experiments.

**c.** Expression change (%) of the endogenous *SOX2* and *SOX2-OT* after e1 repression in KYSE140 cells with and without ectopic expression of *SOX2*. Primers targeting the *SOX2* 3'UTR region were used to distinguish the endogenous and ectopic *SOX2*. n=3 biologically independent experiments. P value is derived from two-sided t-test.

**d.** *SOX2* ChIP-seq profile at the *SOX2-OT* (P3 promoter isoform) locus.

Source data are provided as a Source Data file.

# Supplementary Figure 6

**a**

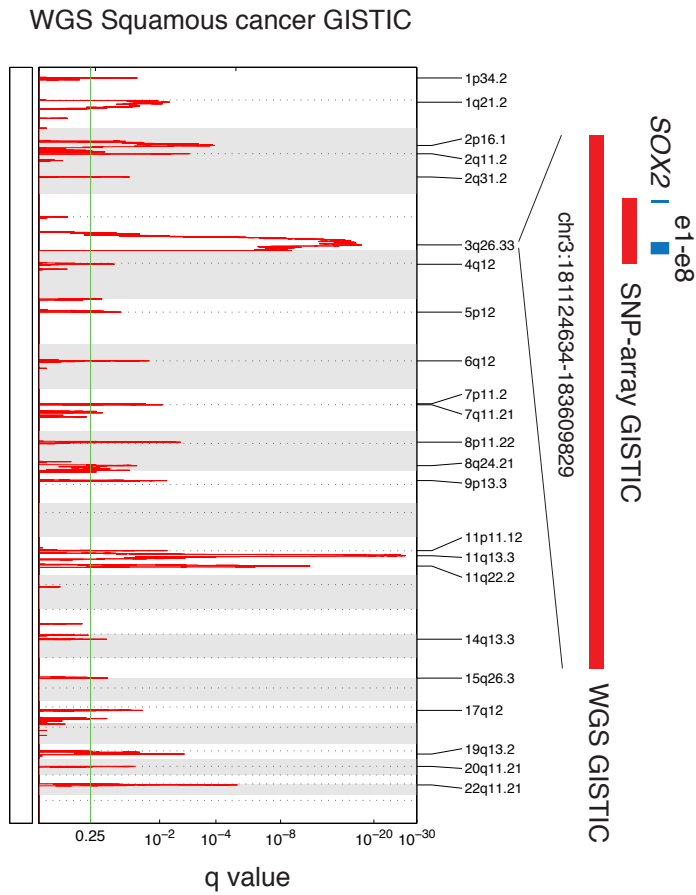

**b**

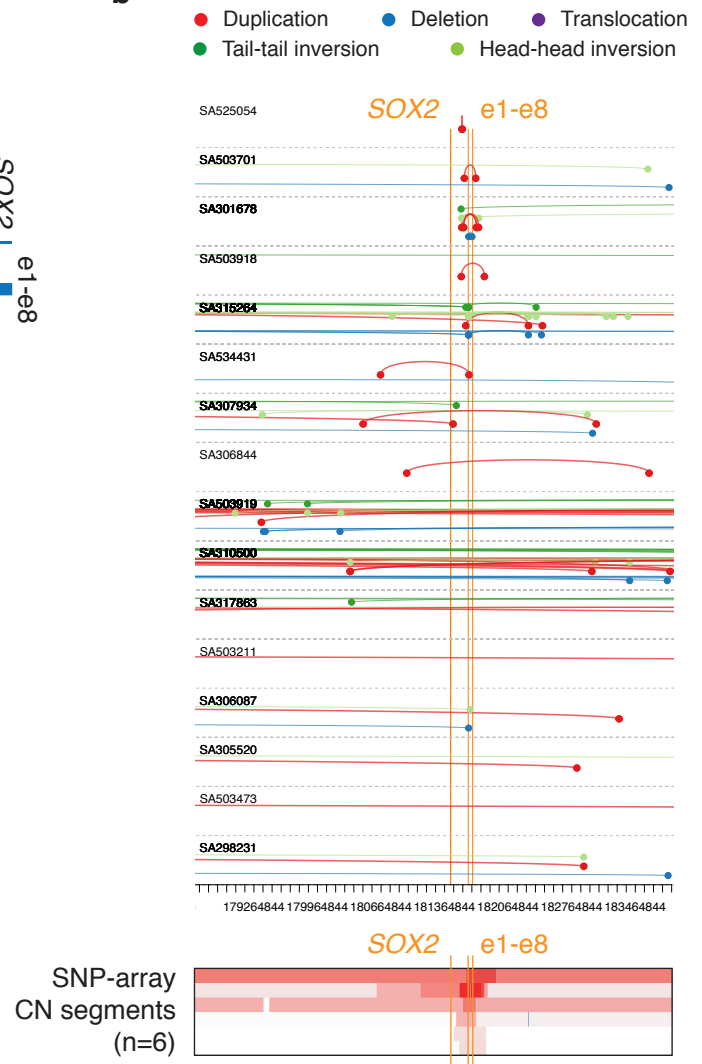

**Supplementary Figure 6:**

**a.** GISTIC result from squamous cancer WGS data.

**b.** Upper: Structural variants identified by WGS analysis at the *SOX2*-e1 locus in squamous cancers. Bottom: SNP-array-based copy number data showing squamous cancer samples that have amplifications of the enhancer region alone.

## Supplementary Figure 7

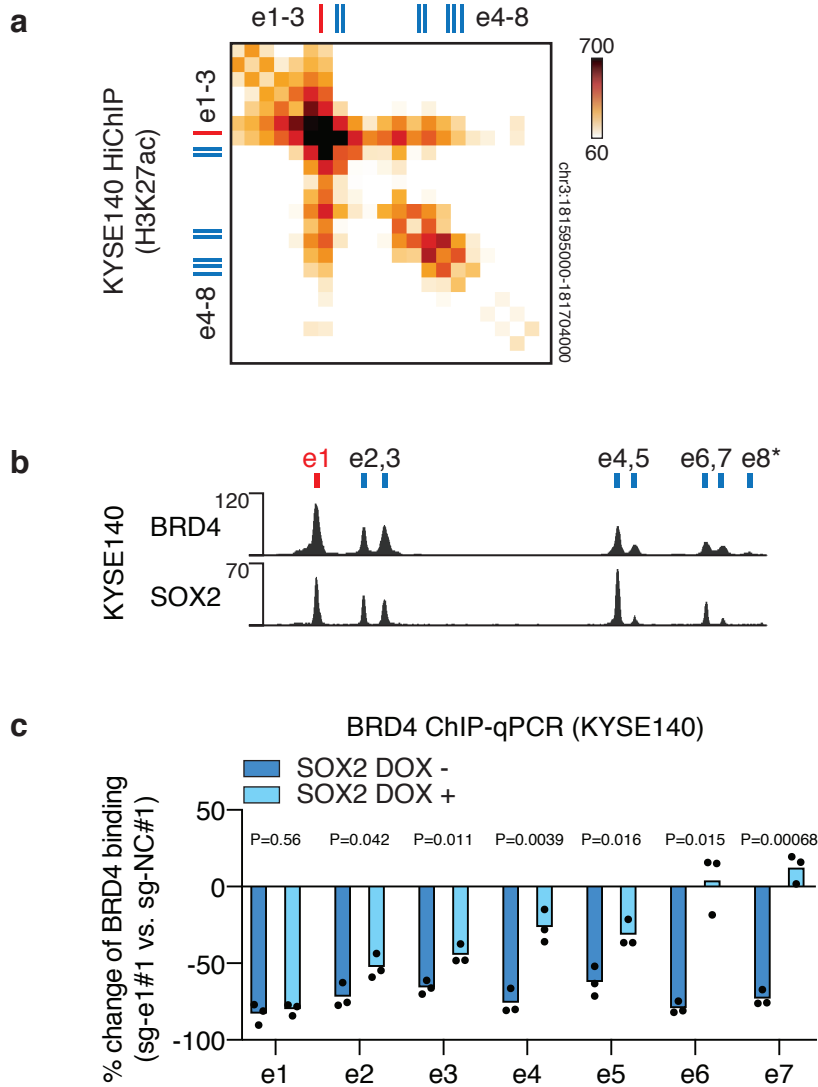

### Supplementary Figure 7:

**a.** H3K27ac HiChIP contact heatmap showing the interaction between e1 and the other enhancers in the squamous cancer enhancer cluster in KYSE140 cells.

**b.** ChIP-seq of BRD4 and SOX2 signal at the e1-e8 locus. \*: based on peak calling, e8 has no significant enrichment of BRD4 in KYSE140 cells. BRD4 ChIP-seq data was from KYSE140 sg-NC#1.

**c.** BRD4 ChIP-qPCR results showing the % change of BRD4 binding at e1-e7 after e1 repression in KYSE140 cells with and without Doxycycline-induced ectopic expression of *SOX2*. n=3 biologically independent experiments. P values are derived from two-sided t-tests.

Source data are provided as a Source Data file.



## Supplementary Figure 8

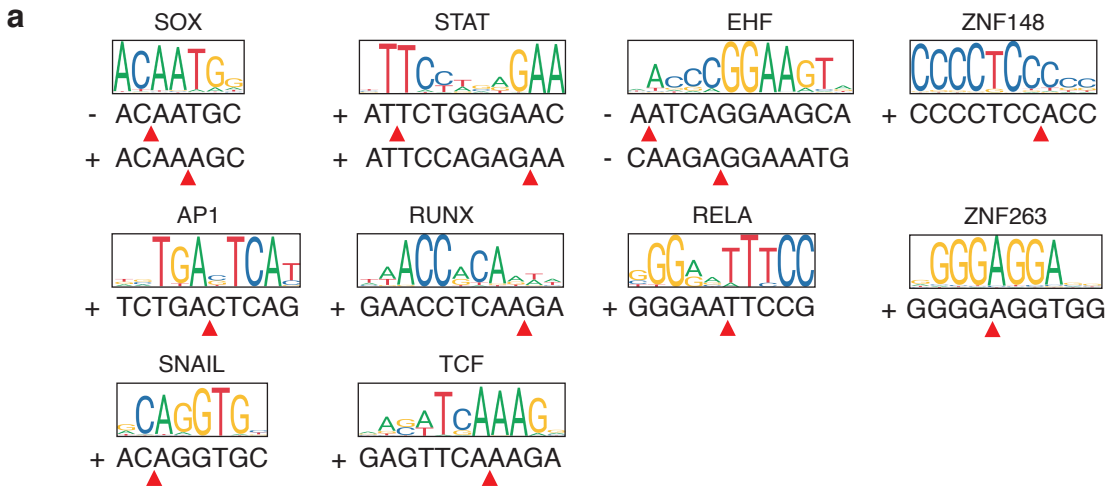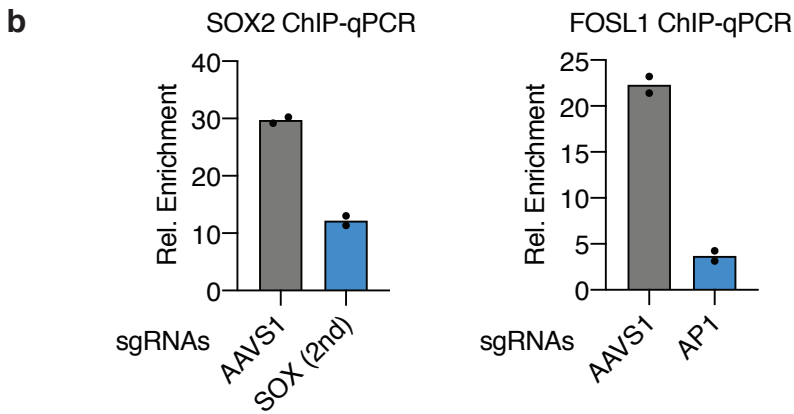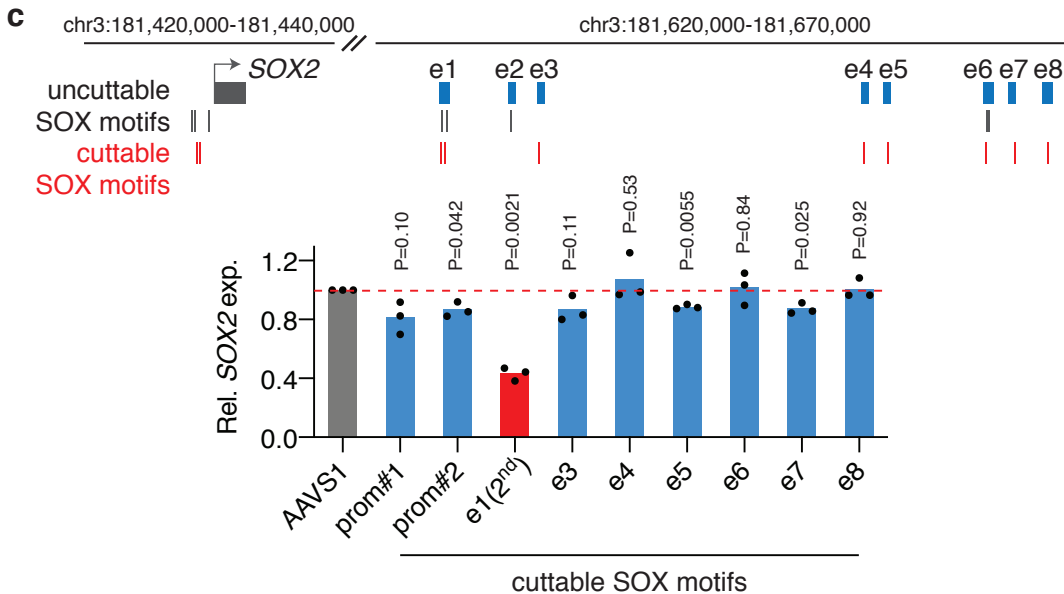

### Supplementary Figure 8:

**a.** List of motifs that are disrupted by CRISPR cutting.

**b.** Left: SOX2 ChIP-qPCR at the e1 enhancer in KYSE140 cells with and without CRISPR-mediated disruption of the 2nd SOX2 motif found in e1. Right: FOSL1 ChIP-qPCR at the e1 enhancer in KYSE140 cells with and without CRISPR-mediated disruption of the AP-1 motif found in e1. ChIP enrichment was normalized to DNA concentration of each sample (measured by Qubit) and then to sonicated genomic input. n=2 biologically independent experiments.

**c.** Expression of *SOX2* in KYSE140 cells with cutting of SOX motifs in e2-e8 and *SOX2* promoter. The expression levels are normalized to the AAVS1 negative control. The 2nd SOX motif in e1 serves as a positive control for the experiment. n=3 biologically independent experiments. P values are derived from two-sided t-tests.

Source data are provided as a Source Data file.

## Supplementary Figure 9

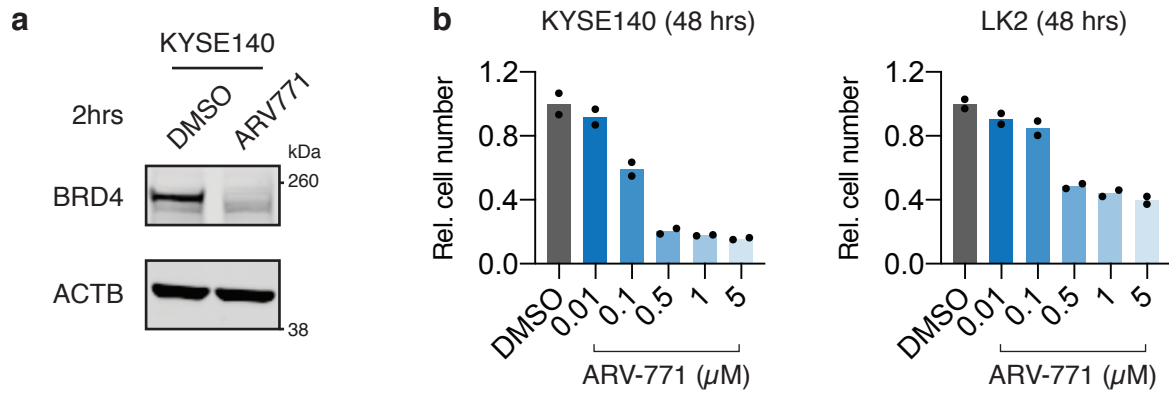

### Supplementary Figure 9:

**a.** Immunoblots of BRD4 and ACTIN in KYSE140 cells treated with two hours of DMSO or 0.5  $\mu$ M ARV-771. The immunoblotting experiment was repeated once independently with similar results.

**b.** Cell proliferation assays of KYSE140 and LK2 cells treated with 48 hours of DMSO or ARV-771. Cell numbers were normalized to the DMSO controls. n=2 biologically independent experiments.

Source data are provided as a Source Data file.

## Supplementary Figure 10

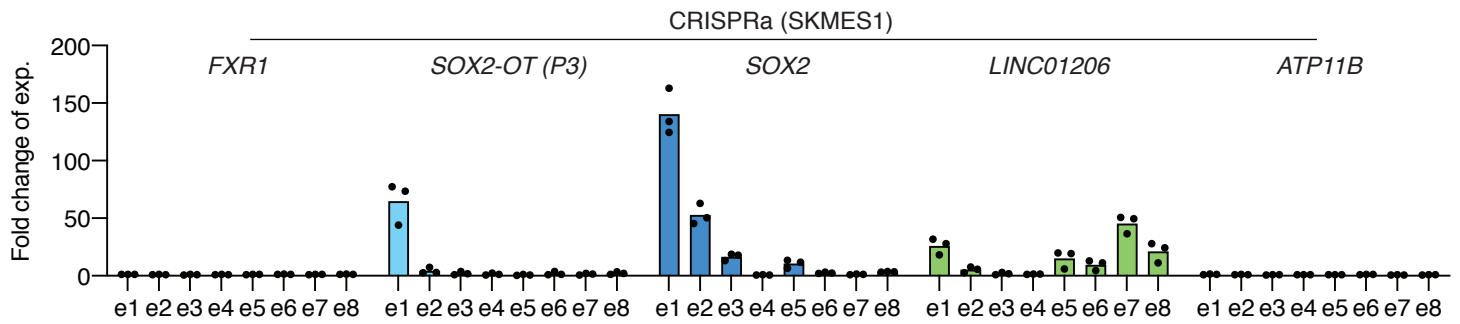

### Supplementary Figure 10:

Expression fold change of *FXR1*, *SOX2-OT* (P3 promoter isoform), *SOX2*, *LINC01206*, and *ATP11B* in SKMES1 cells after CRISPR-mediated activation of e1-e8. The expression levels are normalized to the sg-NC#1 negative control. n=3 biologically independent experiments.

Source data are provided as a Source Data file.

**Table S1: KEGG pathway analysis for e1-activated genes**

Collection(s): CP:KEGG  
# overlaps shown: 20  
# genesets in collections: 186  
# genes in comparison (n): 1526  
# genes in universe (N): 40071

| Gene Set Name                                             | # Genes in Gene Set (K) | Description                                            | # Genes in Overlap (k) | k/K    | p-value  | FDR q-value |
|-----------------------------------------------------------|-------------------------|--------------------------------------------------------|------------------------|--------|----------|-------------|
| KEGG_AXON_GUIDANCE                                        | 129                     | Axon guidance                                          | 22                     | 0.1705 | 3.76E-09 | 5.68E-07    |
| KEGG_LYSOSOME                                             | 121                     | Lysosome                                               | 21                     | 0.1736 | 6.11E-09 | 5.68E-07    |
| KEGG_MAPK_SIGNALING_PATHWAY                               | 267                     | MAPK signaling pathway                                 | 32                     | 0.1199 | 1.20E-08 | 7.46E-07    |
| KEGG_VALINE_LEUCINE_AND_ISOLEUCINE_DEGRADATION            | 44                      | Valine, leucine and isoleucine degradation             | 11                     | 0.25   | 5.68E-07 | 2.53E-05    |
| KEGG_REGULATION_OF_ACTIN_CYTOSKELETON                     | 213                     | Regulation of actin cytoskeleton                       | 25                     | 0.1174 | 6.81E-07 | 2.53E-05    |
| KEGG_PATHWAYS_IN_CANCER                                   | 325                     | Pathways in cancer                                     | 32                     | 0.0985 | 1.11E-06 | 3.44E-05    |
| KEGG_GLYCINE_SERINE_AND_THREONINE_METABOLISM              | 31                      | Glycine, serine and threonine metabolism               | 9                      | 0.2903 | 1.55E-06 | 4.06E-05    |
| KEGG_VASCULAR_SMOOTH_MUSCLE_CONTRACTION                   | 115                     | Vascular smooth muscle contraction                     | 17                     | 0.1478 | 1.74E-06 | 4.06E-05    |
| KEGG_BASAL_CELL_CARCINOMA                                 | 55                      | Basal cell carcinoma                                   | 11                     | 0.2    | 6.03E-06 | 1.25E-04    |
| KEGG_NEUROTROPHIN_SIGNALING_PATHWAY                       | 126                     | Neurotrophin signaling pathway                         | 16                     | 0.127  | 2.50E-05 | 4.65E-04    |
| KEGG_MELANOGENESIS                                        | 101                     | Melanogenesis                                          | 14                     | 0.1386 | 2.95E-05 | 4.99E-04    |
| KEGG_BUTANOATE_METABOLISM                                 | 34                      | Butanoate metabolism                                   | 8                      | 0.2353 | 3.25E-05 | 5.04E-04    |
| KEGG_GAP_JUNCTION                                         | 90                      | Gap junction                                           | 13                     | 0.1444 | 3.62E-05 | 5.18E-04    |
| KEGG_HEDGEHOG_SIGNALING_PATHWAY                           | 56                      | Hedgehog signaling pathway                             | 10                     | 0.1786 | 4.49E-05 | 5.96E-04    |
| KEGG_CALCIIUM_SIGNALING_PATHWAY                           | 178                     | Calcium signaling pathway                              | 19                     | 0.1067 | 5.39E-05 | 6.68E-04    |
| KEGG_ENDOCYTOSIS                                          | 181                     | Endocytosis                                            | 19                     | 0.105  | 6.77E-05 | 7.86E-04    |
| KEGG_TGF_BETA_SIGNALING_PATHWAY                           | 86                      | TGF-beta signaling pathway                             | 12                     | 0.1395 | 1.01E-04 | 1.10E-03    |
| KEGG_ARRHYTHMOGENIC_RIGHT_VENTRICULAR_CARDIOMYOPATHY_ARVC | 74                      | Arrhythmogenic right ventricular cardiomyopathy (ARVC) | 11                     | 0.1486 | 1.09E-04 | 1.12E-03    |
| KEGG_CHEMOKINE_SIGNALING_PATHWAY                          | 189                     | Chemokine signaling pathway                            | 19                     | 0.1005 | 1.21E-04 | 1.14E-03    |
| KEGG_GNRH_SIGNALING_PATHWAY                               | 101                     | GnRH signaling pathway                                 | 13                     | 0.1287 | 1.22E-04 | 1.14E-03    |

**Table S2: Primers used in the study**

| sgRNAs for CRISPRi and CRISPRa                                                        |                            |                           |                                               |
|---------------------------------------------------------------------------------------|----------------------------|---------------------------|-----------------------------------------------|
| Names                                                                                 | Sequences                  | BLAT regions (hg19)       | Notes                                         |
| sg_NC1_F                                                                              | CACCGATCGTTTCCGGTTAACGGCG  | N/A                       | Negative control                              |
| sg_NC1_R                                                                              | AAACCGCCGTTAAAGGGAAACGATC  | N/A                       | Negative control                              |
| sg_NC2_F                                                                              | CACCGCTGAGTGAATAAATAAGATT  |                           |                                               |
| sg_NC2_R                                                                              | AAACAACCTTTATTTTCACTGACG   |                           |                                               |
| sg_Prom_F                                                                             | CACCGCCCCCTTTCATGCAAAACC   | chr3:181429603-181429622  |                                               |
| sg_Prom_R                                                                             | AAACGGTTTTGTCATAAGAGGGGGC  |                           |                                               |
| sg_e1_1_F                                                                             | CACCGGCAACCTTGAACAAAGC     | chr3:181625876-181625895  | Also used for cutting the 2nd SOX motif at e1 |
| sg_e1_1_R                                                                             | AAACGCTTTGTTCAAGGTTTGCC    |                           |                                               |
| sg_e1_2_F                                                                             | CACCGCTCAAGTGAACGTTCCAC    | chr3:181625972-181625991  |                                               |
| sg_e1_2_R                                                                             | AAACGCTGGGAAGCTTCACTTTGAGC |                           |                                               |
| sg_e1_3_F                                                                             | CACCGTCAGAAACCTGCACCTGTG   | chr3:181626079-181626098  | Also used for cutting the SNAIL motif at e1   |
| sg_e1_3_R                                                                             | AAACCCAGGTGCGAGTTTCTGAC    |                           |                                               |
| sg_e2_F                                                                               | CACCGATGTCTCACATATGACGCG   | chr3:181631224-181631243  |                                               |
| sg_e2_R                                                                               | AAACCCAGTCATATGTGAAACATC   |                           |                                               |
| sg_e3_F                                                                               | CACCGCTAAACCACTCCAACTGCG   | chr3:181633517-181633536  |                                               |
| sg_e3_R                                                                               | AAACGCAAGTGTGAGTTGATTAGC   |                           |                                               |
| sg_e4_F                                                                               | CACCGTAAATCTTAGCGTTGGTAA   | chr3:181659352-181659371  |                                               |
| sg_e4_R                                                                               | AAACTTACCAACGCTAAGATTTAC   |                           |                                               |
| sg_e5_F                                                                               | CACCGCATGCTCTAAGACCTAAGG   | chr3:181661141-181661160  |                                               |
| sg_e5_R                                                                               | AAACCCCTTAGGGCTTGAAGCATGC  |                           |                                               |
| sg_e6_F                                                                               | CACCGTCTGAGCTAATGAGATACT   | chr3:181669171-181669190  |                                               |
| sg_e6_R                                                                               | AAACAGTATCTCATTAACGTGAGC   |                           |                                               |
| sg_e7_F                                                                               | CACCGTATATCCCATCCTTCCACA   | chr3:181671025-181671044  |                                               |
| sg_e7_R                                                                               | AAACTGTGAAAGGATGGACATAAC   |                           |                                               |
| sg_e8_F                                                                               | CACCGTACACCCAGACAGATGA     | chr3:181674059-181674078  |                                               |
| sg_e8_R                                                                               | AAACTCACTCTGCTGGGTGATCC    |                           |                                               |
| sgRNAs for CRISPR-mediated motif cutting within the e1 enhancer                       |                            |                           |                                               |
| sg_e1_1 was used to cut the 2nd SOX motif and sg_e1_3 was used to cut the SNAIL motif |                            |                           |                                               |
| Names                                                                                 | Sequences                  | BLAT regions (hg19)       | Notes                                         |
| sg_e1_1stSOX_F                                                                        | CACCGCTTGTGATTTCGATTGTT    | chr3:181625525-181625544  | 1st SOX motif                                 |
| sg_e1_1stSOX_R                                                                        | AAACAACAATGCAATACACAAAGC   |                           |                                               |
| sg_e1_1stSTAT_F                                                                       | CACCGCTGCTAAGAGCCAGCAATCT  | chr3:181625563-181625582  | 1st STAT motif                                |
| sg_e1_1stSTAT_R                                                                       | AAACAAGATTCGTGGCTTCTAGCAGC |                           |                                               |
| sg_e1_1stEHF_F                                                                        | CACCGTTAAACAAAGCAACAAATC   | chr3:181625637-181625656  | 1st EHF motif                                 |
| sg_e1_1stEHF_R                                                                        | AAACGATTTGTTGCTTTTGTAAAC   |                           |                                               |
| sg_e1_2ndEHF_F                                                                        | CACCGTTAAGAGACATTCCTCT     | chr3:181625651-181625670  | 2nd EHF motif                                 |
| sg_e1_2ndEHF_R                                                                        | AAACAGAGGAAATGTCTCTAAAC    |                           |                                               |
| sg_e1_ZNF148_F                                                                        | CACCGAATAAAGGAACGTTGGTGA   | chr3:181625851-181625870  | ZNF148 motif                                  |
| sg_e1_ZNF148_R                                                                        | AAACTCCACCAAGTTCCTTTTATTC  |                           |                                               |
| sg_e1_AP1_F                                                                           | CACCGTGTGTGGCCGAAAGCC      | chr3:181625923-181625942  | AP1 motif                                     |
| sg_e1_AP1_R                                                                           | AAACGAGTCAGAACCTCCACACC    |                           |                                               |
| sg_e1_RUNX_F                                                                          | CACCGCTGTGGGAAGTTCATCTTG   | chr3:181625974-181625993  | RUNX motif                                    |
| sg_e1_RUNX_R                                                                          | AAACCAAGTGAACGTTCCACGACG   |                           |                                               |
| sg_e1_2ndSTAT_F                                                                       | CACCGAGCAGGACGTTTGTCTCT    | chr3:181626001-181626020  | 2nd STAT motif                                |
| sg_e1_2ndSTAT_R                                                                       | AAACGAGAAAGCAAGCTGCTGCTGC  |                           |                                               |
| sg_e1_REL_A_F                                                                         | CACCGAACAATTCCTCCGCAACAA   | chr3:181626036-181626055  | REL_A motif                                   |
| sg_e1_REL_A_R                                                                         | AAACGAATCCCAAGTGAATGTTCC   |                           |                                               |
| sg_e1_ZNF263_F                                                                        | CACCGTCCGCGCAGCAGCGGGAGG   | chr3:181626053-181626072  | ZNF263 motif                                  |
| sg_e1_ZNF263_R                                                                        | AAACCCCTCCCGGTGCTCCGGAAC   |                           |                                               |
| sg_e1_TCF_F                                                                           | CACCGGAGTTGCGAGAGTCAAAG    | chr3:181626110-181626129  | TCF motif                                     |
| sg_e1_TCF_R                                                                           | AAACCTTGAACCTGCGCAACTCC    |                           |                                               |
| sgRNAs for CRISPR-mediated cutting of SOX motifs outside of e1                        |                            |                           |                                               |
| Names                                                                                 | Sequences                  | BLAT regions (hg19)       | Notes                                         |
| prom_SOX_1st_F                                                                        | CACCGAATCTTACGTCGGGCAAA    | chr3:181428321-181428340  |                                               |
| prom_SOX_1st_R                                                                        | AAACATTGTCCCGACGTAAGATTC   |                           |                                               |
| prom_SOX_2nd_F                                                                        | CACCGGGCTTTGGCCGACCAACAA   | chr3:181428571-181428590  |                                               |
| prom_SOX_2nd_R                                                                        | AAACTGTGTGGCCGAAAGCC       |                           |                                               |
| e3_SOX_F                                                                              | CACCGTCTGATCTTAGGGAACAA    | chr3:181633327-181633346  |                                               |
| e3_SOX_R                                                                              | AAACTTGTCCCTAAGTATCAGGAC   |                           |                                               |
| e4_SOX_F                                                                              | CACCGTCTGTTCTTGCATACAA     | chr3:181659264-181659283  |                                               |
| e4_SOX_R                                                                              | AAACATTGTATGCAAGAACCAAGC   |                           |                                               |
| e5_SOX_F                                                                              | CACCGAAAGGCTTCAAGGAAACAA   | chr3:181661244-181661263  |                                               |
| e5_SOX_R                                                                              | AAACCATTTGTTGCGTTGAAGCTTTC |                           |                                               |
| e6_SOX_F                                                                              | CACCGTCTGATTCGCAAGAAACAA   | chr3:181669056-181669075  |                                               |
| e6_SOX_R                                                                              | AAACTGTTTCTTCTGATAGTGAC    |                           |                                               |
| e7_SOX_F                                                                              | CACCGACTGAAAACCTTAAACACAA  | chr3:181671304-181671323  |                                               |
| e7_SOX_R                                                                              | AAACTTGTGTTAAGTTTTTCACTC   |                           |                                               |
| e8_SOX_F                                                                              | CACCGTGGGAACATTCACACAA     | chr3:181674027-181674046  |                                               |
| e8_SOX_R                                                                              | AAACTTGTGTAATGTTCCACC      |                           |                                               |
| sgRNA for CRISPR-mediated SOX2 knockout                                               |                            |                           |                                               |
| Names                                                                                 | Sequences                  | BLAT regions (hg19)       | Notes                                         |
| sg_AAVS1_F                                                                            | CACCGAGCCACATTAACGGCCCT    | chr19:55627180-55627199   | Negative control                              |
| sg_AAVS1_R                                                                            | AAACAGGGCCGTTAATGTGGCTC    |                           |                                               |
| sg_chr22_F                                                                            | CACCGGTGTGCGTATGAAGCAGTG   | chr2:151131560-151131579  | Negative control                              |
| sg_chr22_R                                                                            | AAACGAGTCTGTATACCCAGCC     |                           |                                               |
| sg_SOX2_1_F                                                                           | CACCGTCCGATGCTATTGCCGCG    | chr3:181430550-181430569  |                                               |
| sg_SOX2_1_R                                                                           | AAACCGGGGCAATAGCATGGCGAC   |                           |                                               |
| sg_SOX2_2_F                                                                           | CACCGAAAGTTTCACTCGGGGCC    | chr3:181430373-181430392  |                                               |
| sg_SOX2_2_R                                                                           | AAACGGGCGCGAGTGGAACTTTC    |                           |                                               |
| sg_SOX2_3_F                                                                           | CACCGCAAGGCGCTGGGCGCGAG    | chr3:181430363-181430382  |                                               |
| sg_SOX2_3_R                                                                           | AAACCTCGGCGCCAGGCGCTTGC    |                           |                                               |
| sg_SOX2_4_F                                                                           | CACCGGGAAACCCAGAAACAGCC    | chr3:181430241-181430260  |                                               |
| sg_SOX2_4_R                                                                           | AAACGGCTGTTTCTGTTGCCCG     |                           |                                               |
| RT-qPCR                                                                               |                            |                           |                                               |
| Names                                                                                 | Sequences                  | Target genes              | Notes                                         |
| RT_ACTB_F                                                                             | CAACCGGAGAAAGATGAC         | ACTB                      |                                               |
| RT_ACTB_R                                                                             | AGCCTGATGACACCTGACAA       |                           |                                               |
| RT_HPR1_F                                                                             | GACCAAGTCAACAGGGGACAT      | HPR1                      |                                               |
| RT_HPR1_R                                                                             | CCTGACCAAGAAAGCAAAAG       |                           |                                               |
| RT_GAPDH_F                                                                            | GGAGCGAGATCCCTCCAAAAT      | GAPDH                     |                                               |
| RT_GAPDH_R                                                                            | GGCTGTGTCACTACTTCTCATGG    |                           |                                               |
| RT_SOX2_1_F                                                                           | ACGAGCTGCGAGACCTCAT        | SOX2 (exon)               |                                               |
| RT_SOX2_1_R                                                                           | TGGAGTGGGAGGAAGAGGTA       |                           |                                               |
| RT_SOX2_2_F                                                                           | GGAGCTTTGACGGAAGTTTG       | SOX2 (3'UTR)              |                                               |
| RT_SOX2_2_R                                                                           | GCAAGAAAGCCTCCTTCAA        |                           |                                               |
| RT_FXR1_F                                                                             | GTGGCAATCTCCATCAGT         | FXR1                      |                                               |
| RT_FXR1_R                                                                             | ACCGCTACGACGGTTAGTA        |                           |                                               |
| RT_ATP11B_F                                                                           | TGACATCATGTGCTGTTTC        | ATP11B                    |                                               |
| RT_ATP11B_R                                                                           | TCAAGATGCTGCTGCTG          |                           |                                               |
| RT_SOX2OT_F                                                                           | TTTGAAACTCCCTTGCAC         | SOX2OT (P3)               |                                               |
| RT_SOX2OT_R                                                                           | GAAAGAGGACCAAGCTGACTG      |                           |                                               |
| RT_LINC01206_F                                                                        | AGGCTTAGGCAATGGGAAGT       | LINC01206                 |                                               |
| RT_LINC01206_R                                                                        | TGCTGTCTTCTCTCACT          |                           |                                               |
| ChIP-qPCR                                                                             |                            |                           |                                               |
| Names                                                                                 | Sequences                  | Amplified regions (hg19)  | Notes                                         |
| ChIP_NCR_F                                                                            | TGGGTGTGTCATCTGGTAA        | chr3:129250860-129250952  | Negative control region                       |
| ChIP_NCR_R                                                                            | GGATGGAAATGGATCAGATGG      |                           |                                               |
| ChIP_NCR2_F                                                                           | GCTGCTTATGGCTGTTCC         | chr11:112964712-112964844 | Negative control region                       |
| ChIP_NCR2_R                                                                           | GCAGCTGCGCTTAACTGT         |                           |                                               |
| ChIP_SOX2_prom_F                                                                      | TGTCGCTGAAACCCTATTT        | chr3:181429668-181429764  |                                               |
| ChIP_SOX2_prom_R                                                                      | TCTGCTGTAAGCACTCGA         |                           |                                               |
| ChIP_SOX2_e1_F                                                                        | CCTCCACCAGTCTCCTTTA        | chr3:181625849-181625947  |                                               |
| ChIP_SOX2_e1_R                                                                        | AGCCTGAGTCAGAACCTCCA       |                           |                                               |
| ChIP_SOX2_e2_F                                                                        | CCTGACCAAGCAATGAATG        | chr3:181631166-181631252  |                                               |
| ChIP_SOX2_e2_R                                                                        | TCCTGGGACATGTCTCACA        |                           |                                               |
| ChIP_SOX2_e3_F                                                                        | GAGCAACTTAGCAGCCTCC        | chr3:181633496-181633595  |                                               |
| ChIP_SOX2_e3_R                                                                        | CTGACTCTGTCACCACTTTC       |                           |                                               |
| ChIP_SOX2_e4_F                                                                        | AGAGCCGTTACCACGCTAA        | chr3:181659345-181659414  |                                               |
| ChIP_SOX2_e4_R                                                                        | GACGGCTTTGGAACATTT         |                           |                                               |
| ChIP_SOX2_e5_F                                                                        | CGAGGGATACCCCTTAAAGC       | chr3:181661191-181661260  |                                               |
| ChIP_SOX2_e5_R                                                                        | TGTTGCTTGAAGCTTCTC         |                           |                                               |
| ChIP_SOX2_e6_F                                                                        | GTGAGGGGTGATACACAGA        | chr3:181669354-181669457  |                                               |
| ChIP_SOX2_e6_R                                                                        | GGACTCCCAAGTGTGTGAGA       |                           |                                               |
| ChIP_SOX2_e7_F                                                                        | GCGATCACAGCTACCTCAT        | chr3:181671396-181671499  |                                               |
| ChIP_SOX2_e7_R                                                                        | GCTGATGGCTTTGATTT          |                           |                                               |

# Uncropped immunoblots included in supplementary figures

**Supplementary Fig. 4b**

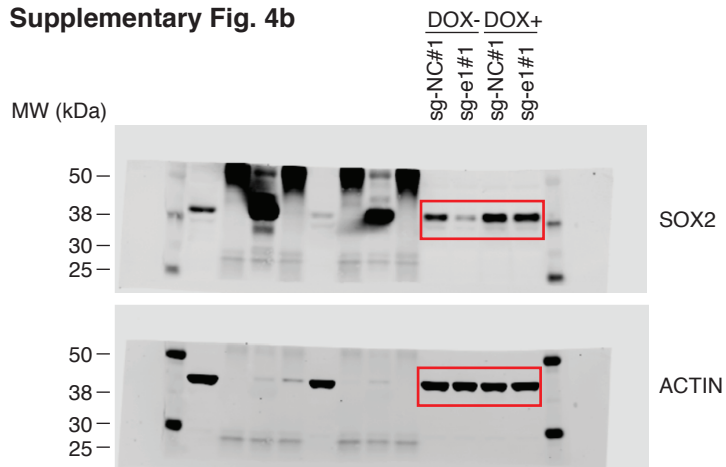

The above two images are from the same membrane that was scanned with two separate channels in LI-COR.

**Supplementary Fig. 9a**

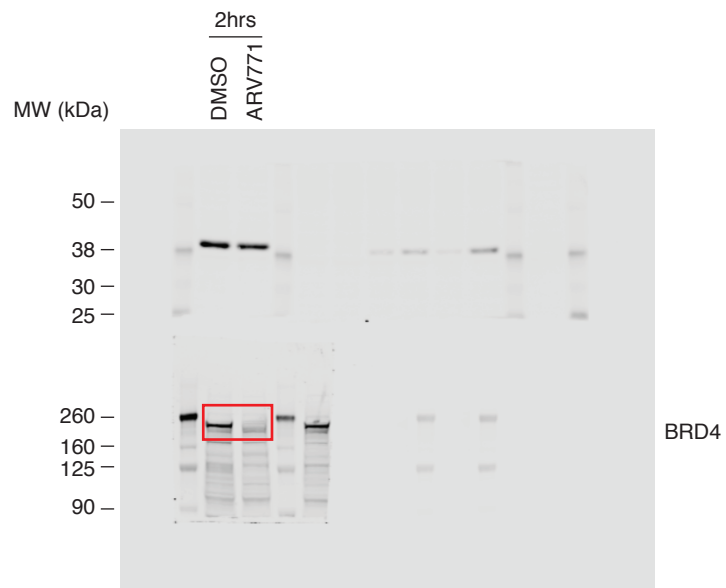

**Supplementary Fig. 4c**

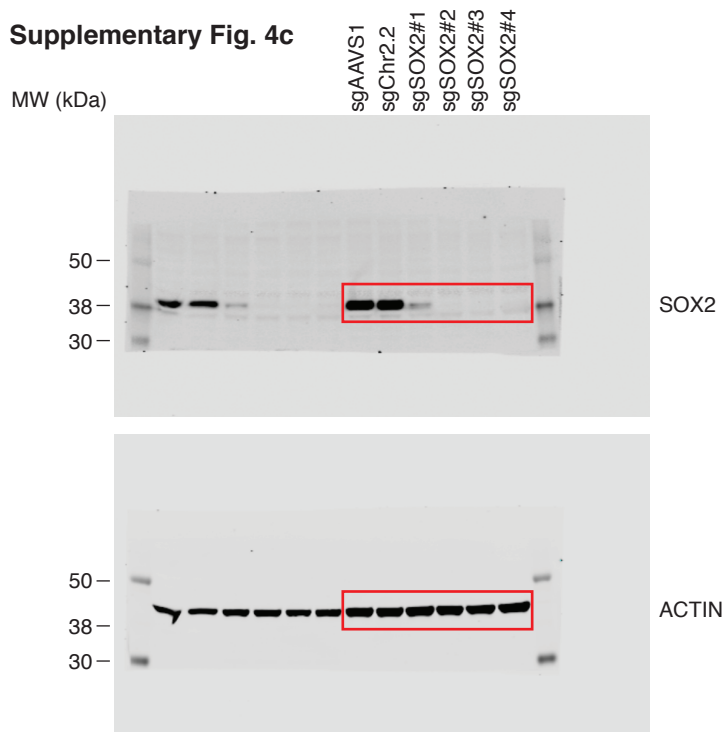

The above two images are from the same membrane that was scanned with two separate channels in LI-COR.

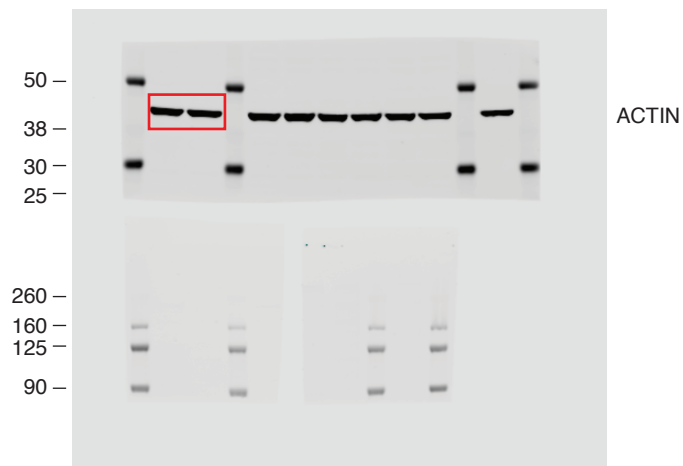

The above two images are from the same set of membranes that were scanned with two separate channels in LI-COR.
